# Supplementary material for: Restoration of CD4+ T Cells during NAFLD without Modulation of the Hepatic Immunological Pattern Is Not Sufficient to Prevent HCC
Source: MDPI journal article supplement (doi:10.3390/cancers14225502), 2022-11-09
Supplement: s1 [file s1]

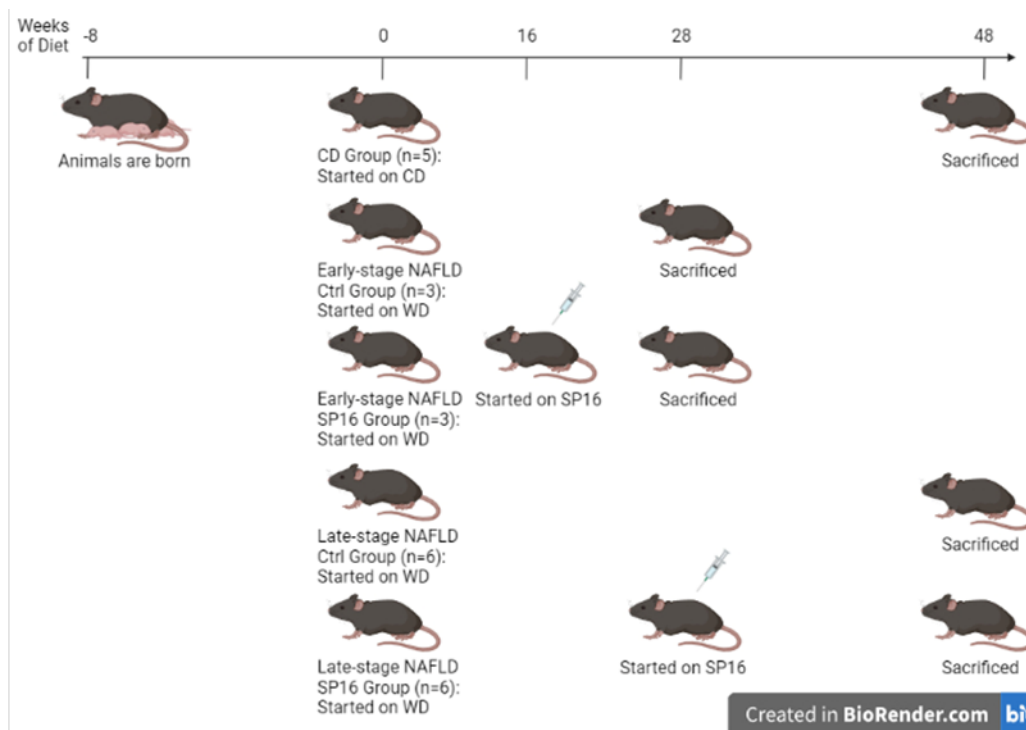

**Figure S1. DIAMOND mice treatment groups.** Our study consists of an early-stage NAFLD and late-stage NAFLD treatment groups and a CD group. The CD group consists of five male DIAMOND mice that were started on a CD at eight weeks of age and were continued on a CD until time of sacrifice. The early-stage NAFLD ctrl group consists of three male DIAMOND mice that were started on a WD at eight weeks of age and were continued on a WD until time of sacrifice. The early-stage NAFLD SP16 group consists of three male DIAMOND mice that were started on a WD at eight weeks of age and then were started on treatment with SP16 after being on a WD for 16 weeks and were continued on SP16 treatment and WD until time of sacrifice. The late-stage NAFLD ctrl group consists of six male DIAMOND mice that were started on a WD at eight weeks of age and were continued on a WD until time of sacrifice. The late-stage NAFLD SP16 group consists of six male DIAMOND mice that were started on a WD at eight weeks of age and then were started on treatment with SP16 after being on a WD for 28 weeks and were continued on SP16 treatment and WD until time of sacrifice.

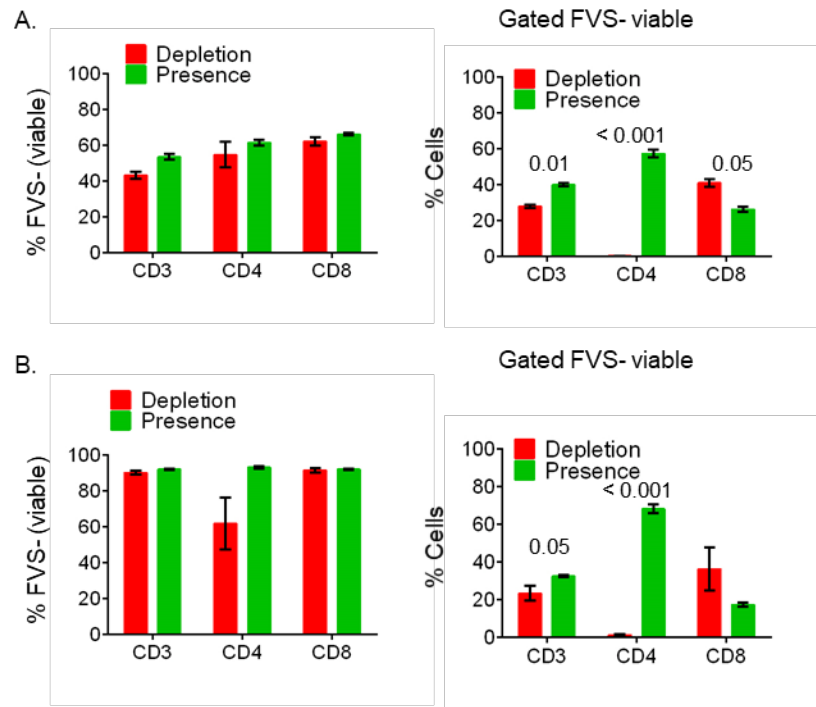

**Figure S2. Hepatic and systemic effect of CD4 depletion on T cells, *in vivo*.** Male DIAMOND mice were started on a WD at two months of age (Ctrl n=6, SP16 n=6). SP16 treatment was started after being on a WD for 28 weeks, WD was continued throughout course. Animals were sacrificed after being on a WD for 48 weeks. Livers and spleens were collected and subjected to flow cytometry analysis. Animals on a WD were grouped regardless of treatment (Depletion n=4 or 3, Presence n=8 or 9). Hepatic CD3+ T cells and CD4+CD3+ and CD8+CD3+ T cells were gated for FVS- viability. FVS- viable cells were gated for percentage of CD3+ or CD3+CD8+ or CD3+CD4+ T cells (A). Spleens were subjected to the same analysis as A (B). Error bars are SEM.

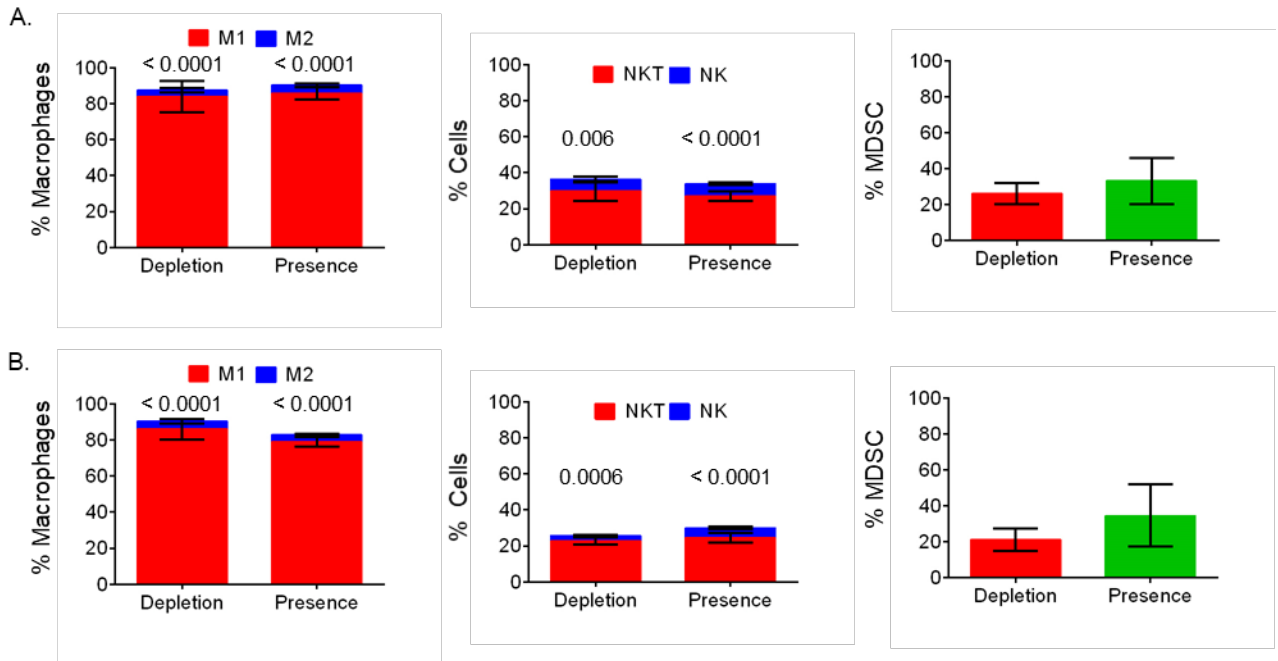

**Figure S3. Hepatic and systemic immunological effect of CD4 depletion, *in vivo*.** Male DIAMOND mice were started on a WD at two months of age (Ctrl n=6, SP16 n=6). SP16 treatment was started after being on a WD for 28 weeks, WD was continued throughout course. Animals were sacrificed after being on a WD for 48 weeks. Livers and spleens were collected and subjected to flow cytometry analysis. Animals on a WD were grouped regardless of treatment (Depletion n=4 or 3, Presence n=8 or 9). FVS- viable cells were analyzed for percentage of M1 (F4/80+CD68+CD206-) and M2 (F4/80+CD68+/-CD206+) macrophages, NK cells (CD3-CD4-CD8-CD49b+), NKT cells (CD3+CD4-CD8-CD49b+) and CD11b+Gr1+MDSCs. (A). Spleens were analyzed as described in A (B). Error bars are SEM.

A.

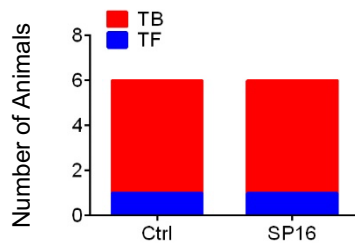

B.

| Liver | Treatment Group |  | TB        |          | TF        |          |
|-------|-----------------|--|-----------|----------|-----------|----------|
|       |                 |  | Depletion | Presence | Depletion | Presence |
| Ctrl  |                 |  | 4         | 1        | 0         | 1        |
|       |                 |  | 5         |          | 1         |          |
| SP16  |                 |  | 0         | 5        | 0         | 1        |
|       |                 |  | 5         |          | 1         |          |

  

| Spleen | Treatment Group |  | TB        |          | TF        |          |
|--------|-----------------|--|-----------|----------|-----------|----------|
|        |                 |  | Depletion | Presence | Depletion | Presence |
| Ctrl   |                 |  | 3         | 2        | 0         | 1        |
|        |                 |  | 5         |          | 1         |          |
| SP16   |                 |  | 0         | 5        | 0         | 1        |
|        |                 |  | 5         |          | 1         |          |

C.

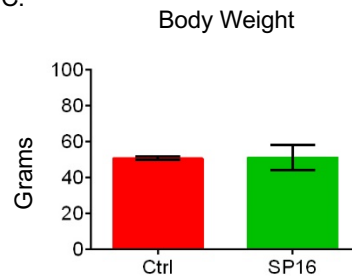

D.

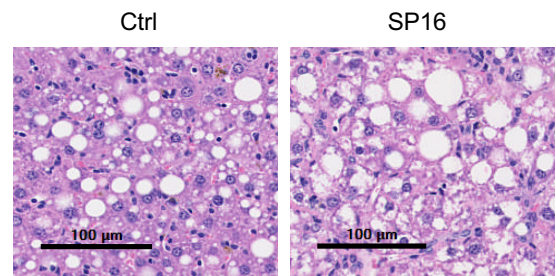

**Figure S4. SP16 treatment did not affect tumor incidence, body weight or liver steatosis, *in vivo*.** Male DIAMOND mice were started on a WD at two months of age (Ctrl n=6, SP16 n=6). SP16 treatment was started after being on a WD for 28 weeks, WD was continued throughout course. Animals were sacrificed after being on a WD for 48 weeks and their tumor incidence (TF=tumor free, TB=tumor bearing) (A) and body weight was recorded (C). CD4 depletion was not associated with TB or TF status in animals on a WD (B). After sacrifice, livers were subjected to H&E staining, representative pictures are 10X (D). Error bars represent SEM.
